# Supplementary material for: A diselenide bond-containing ROS-responsive ruthenium nanoplatform delivers nerve growth factor for Alzheimer's disease management by repairing and promoting neuron regeneration
Source: Royal Society of Chemistry journal article supplement (doi:10.1039/d1tb01290h), 2021-01-01
Supplement: d1tb01290h1.pdf [file d1tb01290h1.pdf]

## Electronic Supplementary Information

### **Diselenide Bond-Containing ROS-Responsive Ruthenium Nanoplatfom Delivers Nerve Growth Factor for Alzheimer's Disease Management by Repairing and Promoting Neuron Regeneration**

Xiaoyu Yuan ‡<sup>a</sup>, Zhi Jia ‡<sup>a</sup>, Jin Li<sup>\*b</sup>, Yanan Liu<sup>a</sup>, Yuqin Huang<sup>a</sup>, Youcong Gong<sup>a</sup>, Xian Guo<sup>a</sup>, Xu Chen<sup>a</sup>, Jieqiong Cen<sup>a</sup>, Jie Liu<sup>\*a</sup>

<sup>a</sup>Department of Chemistry, College of Chemistry and Materials Science, Jinan University, Guangzhou 511436, China.

<sup>b</sup>Department of Pain Management, the First Affiliated Hospital, Jinan University, Guangzhou 510630, China

\* Corresponding author, Jie Liu, Email: tliuliu@jnu.edu.cn;

Jin Li, Email: 65887512@qq.com

‡ Xiaoyu Yuan and Zhi Jia contributed equally to this work and should be regarded as first co-authors.

Fax: +86-20-85220223; Tel: +86 020-37331547 (J.L.)

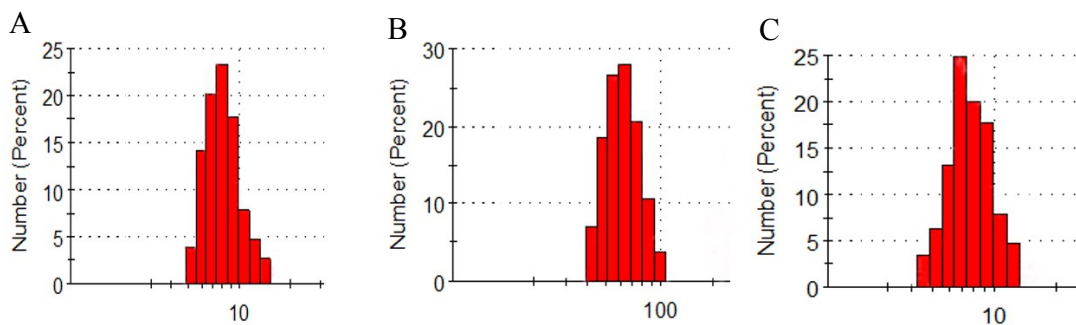

**Fig. S1** Z-average diameter of different nanoparticles. (A) Ru NPs, (B) R@NGF-Se-Se-Ru and (C) R@NGF-Se-Se-Ru+ H<sub>2</sub>O<sub>2</sub>

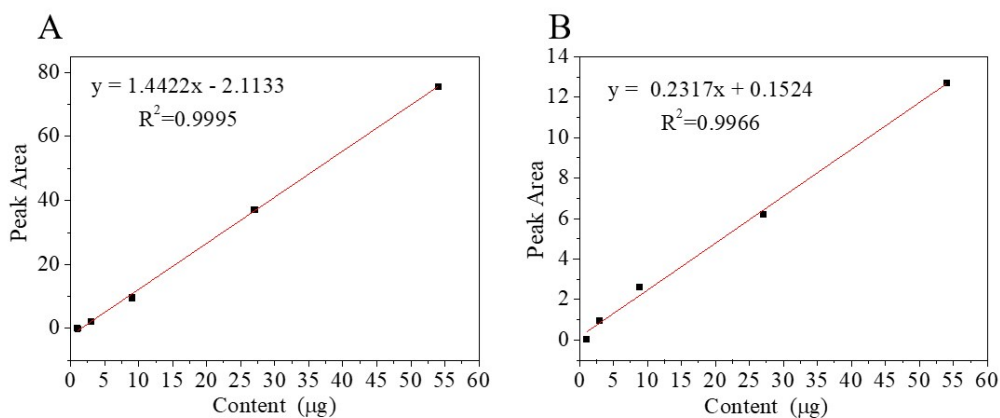

**Fig. S2** Quantify the amount of peptides loading R(A) and NGF(B).

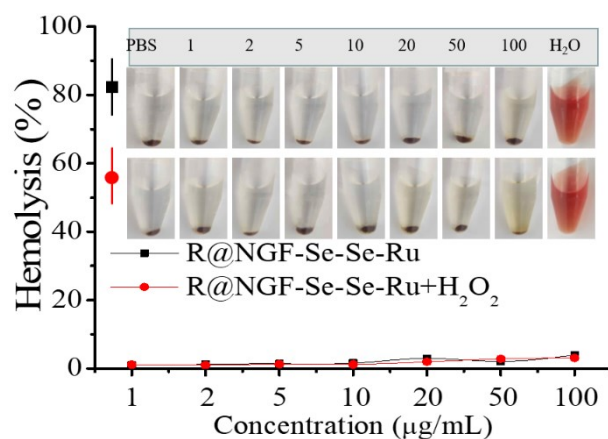

**Fig. S3** Biocompatibility assay. Photographs and quantitative results for membrane-breaking activity of nanoparticles or treatment with H<sub>2</sub>O<sub>2</sub> to mouse RBCs versus different concentrations.

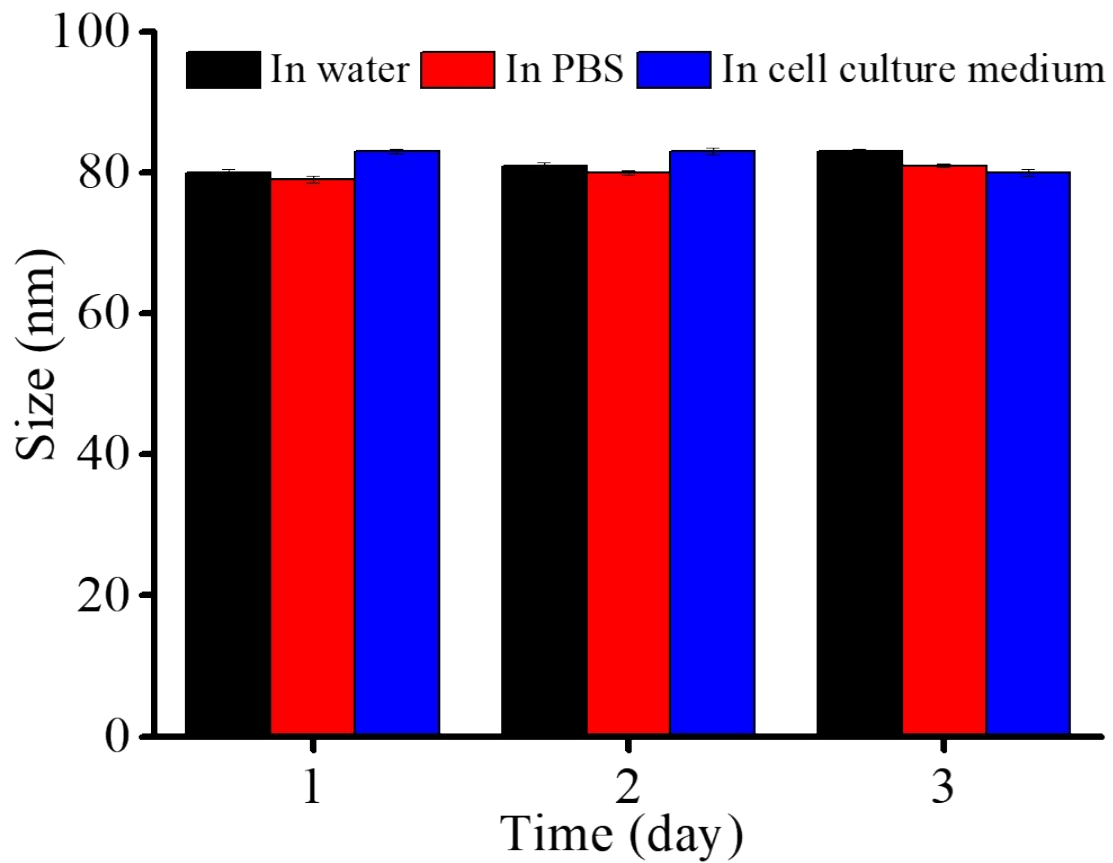

**Fig. S4** Stability of R@NGF-Se-Se-Ru in water, PBS (pH 7.4) buffer and cell culture medium

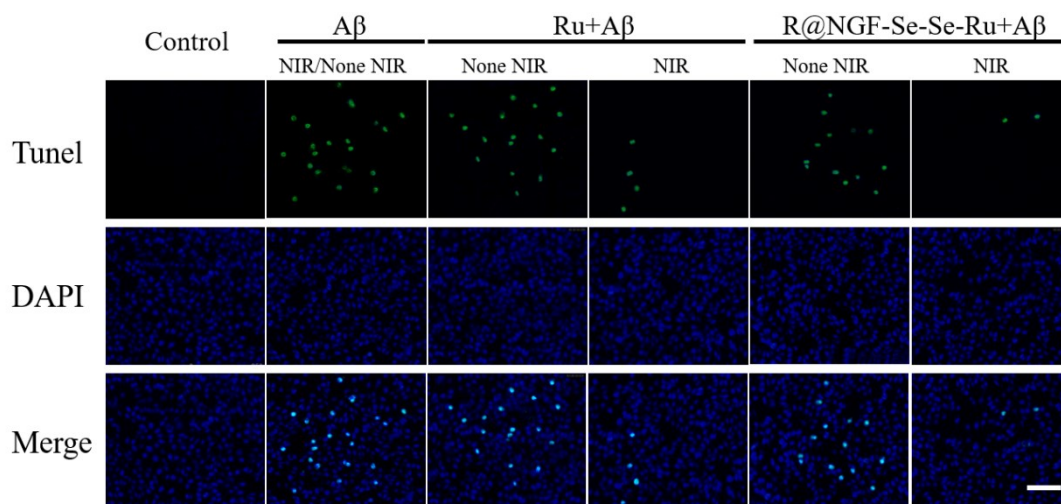

**Fig. S5** The effect of sRu NPs, R@NGF-Se-Se-Ru (20  $\mu\text{g}/\text{mL}$ ) with or without NIR on DNA fragmentation induced by disrupted A $\beta$  fibrils; scale bar=25 $\mu\text{m}$ .

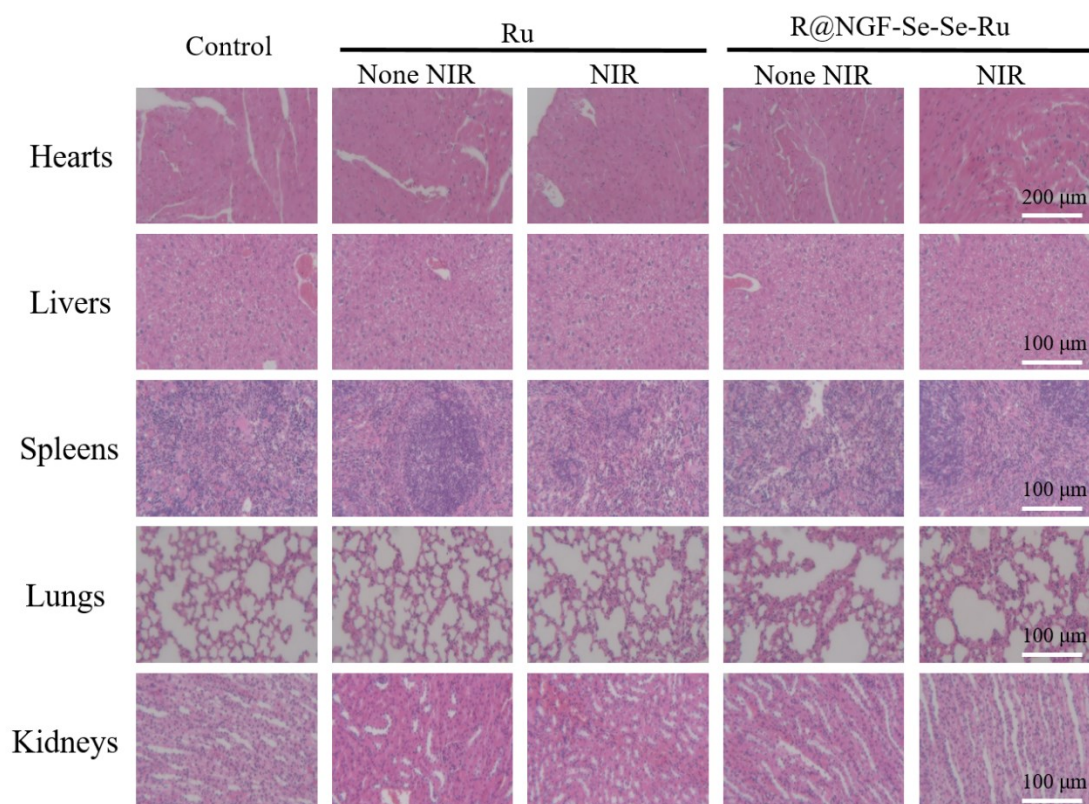

**Fig. S6** Representative images of H&E staining sections of the heart, liver, spleen, and kidneys collected from the mice at the end of the efficacy experiment.
